# Supplementary material for: Cost-Effectiveness of Colorectal Cancer Surveillance in Hodgkin Lymphoma Survivors Treated with Procarbazine and/or Infradiaphragmatic Radiotherapy
Source: Oxford University Press journal article supplement (doi:10.1158/1055-9965.epi-22-0019), 2022-09-27
Supplement: epi-22-0019_supplementary_table_4-6_suppst4-6.docx [file epi-22-0019_supplementary_table_4-6_suppst4-6.docx]

**Supplementary Table S4:** Number of colonoscopies needed to prevent a colorectal cancer death for eachsurveillance strategies among HL Survivors (entire cohort not stratified by treatment, base case analysis).

| **Surveillance strategy** | **Outcomes per 1,000 HL survivors free of CRC diagnosis and aged 35 years in 2019 (3%)*** | | | | |
| --- | --- | --- | --- | --- | --- |
| **CRC deaths predicted***,† | **CRC mortality**  **(reduction, %)***,‡ | **NNS**† | **COLs**† | **Total**  **Costs**  **($1,000**§**)** | |
| No Surveillance | 26.05 | 0.00 | 0.00 | 73.02 | 965.53 | |
| FIT10, 35-70, 1 years | 5.46 | 79.03 | 164.35 | 3383.88 | 2339.48 | |
| FIT10, 35-75, 1 years | 5.21 | 80.00 | 167.23 | 3485.07 | 2370.04 | |
| FIT10, 40-70, 1 years | 5.74 | 77.96 | 141.99 | 2883.77 | 1962.79 | |
| FIT10, 40-75, 1 years | 5.47 | 79.00 | 145.10 | 2986.24 | 1993.74 | |
| FIT10, 45-70, 1 years | 6.36 | 75.58 | 120.68 | 2376.21 | 1657.40 | |
| FIT10, 45-75, 1 years | 6.10 | 76.60 | 124.21 | 2478.05 | 1688.14 | |
| FIT10, 50-70, 1 years | 7.77 | 70.17 | 101.88 | 1862.29 | 1425.14 | |
| FIT10, 50-75, 1 years | 7.49 | 71.24 | 105.82 | 1963.93 | 1455.79 | |
| FIT10, 35-70, 2 years | 7.03 | 73.01 | 115.07 | 2188.59 | 1746.81 | |
| FIT10, 35-75, 2 years | 6.63 | 74.55 | 116.07 | 2254.01 | 1769.14 | |
| FIT10, 40-70, 2 years | 7.30 | 71.99 | 101.94 | 1911.44 | 1546.32 | |
| FIT10, 40-75, 2 years | 7.02 | 73.04 | 102.86 | 1957.47 | 1562.09 | |
| FIT10, 45-70, 2 years | 7.99 | 69.32 | 88.55 | 1599.29 | 1374.86 | |
| FIT10, 45-75, 2 years | 7.57 | 70.96 | 90.12 | 1665.39 | 1397.52 | |
| FIT10, 50-70, 2 years | 9.37 | 64.02 | 76.71 | 1279.46 | 1249.98 | |
| FIT10, 50-75, 2 years | 9.06 | 65.21 | 78.07 | 1326.46 | 1266.09 | |
| FIT20, 35-70, 1 years | 6.18 | 76.27 | 122.78 | 2439.72 | 1943.12 | |
| FIT20, 35-75, 1 years | 5.86 | 77.50 | 124.09 | 2505.44 | 1966.68 | |
| FIT20, 40-70, 1 years | 6.52 | 74.97 | 107.97 | 2108.69 | 1681.30 | |
| FIT20, 40-75, 1 years | 6.17 | 76.31 | 109.40 | 2174.95 | 1704.95 | |
| FIT20, 45-70, 1 years | 7.18 | 72.45 | 93.21 | 1758.87 | 1467.73 | |
| FIT20, 45-75, 1 years | 6.83 | 73.78 | 94.97 | 1825.40 | 1491.51 | |
| FIT20, 50-70, 1 years | 8.60 | 66.98 | 79.70 | 1390.76 | 1305.60 | |
| FIT20, 50-75, 1 years | 8.23 | 68.42 | 81.82 | 1458.02 | 1329.71 | |
| FIT20, 35-70, 2 years | 8.57 | 67.09 | 89.90 | 1571.38 | 1527.39 | |
| FIT20, 35-75, 2 years | 8.05 | 69.10 | 89.85 | 1617.25 | 1547.70 | |
| FIT20, 40-70, 2 years | 8.78 | 66.29 | 80.36 | 1387.79 | 1389.96 | |
| FIT20, 40-75, 2 years | 8.44 | 67.61 | 80.63 | 1419.82 | 1404.19 | |
| FIT20, 45-70, 2 years | 9.52 | 63.47 | 70.95 | 1172.79 | 1271.31 | |
| FIT20, 45-75, 2 years | 8.95 | 65.63 | 71.32 | 1219.65 | 1292.08 | |
| FIT20, 50-70, 2 years | 10.81 | 58.49 | 62.21 | 948.09 | 1186.22 | |
| FIT20, 50-75, 2 years | 10.43 | 59.98 | 62.82 | 981.18 | 1200.95 | |
| FIT47, 35-70, 1 years | 6.94 | 73.38 | 97.54 | 1864.07 | 1736.64 | |
| FIT47, 35-75, 1 years | 6.52 | 74.98 | 97.90 | 1911.92 | 1757.78 | |
| FIT47, 40-70, 1 years | 7.28 | 72.04 | 86.66 | 1626.66 | 1536.67 | |
| FIT47, 40-75, 1 years | 6.85 | 73.72 | 87.24 | 1674.92 | 1558.01 | |
| FIT47, 45-70, 1 years | 7.93 | 69.56 | 75.46 | 1367.34 | 1372.94 | |
| FIT47, 45-75, 1 years | 7.48 | 71.28 | 76.25 | 1415.96 | 1394.57 | |
| FIT47, 50-70, 1 years | 9.37 | 64.05 | 65.25 | 1088.33 | 1250.59 | |
| FIT47, 50-75, 1 years | 8.89 | 65.87 | 66.31 | 1137.95 | 1272.76 | |
| FIT47, 35-70, 2 years | 9.82 | 62.30 | 73.08 | 1186.13 | 1417.45 | |
| FIT47, 35-75, 2 years | 9.18 | 64.75 | 72.42 | 1221.67 | 1438.31 | |
| FIT47, 40-70, 2 years | 10.00 | 61.63 | 65.80 | 1056.03 | 1313.93 | |
| FIT47, 40-75, 2 years | 9.58 | 63.23 | 65.62 | 1080.74 | 1328.56 | |
| FIT47, 45-70, 2 years | 10.72 | 58.84 | 58.53 | 897.26 | 1223.92 | |
| FIT47, 45-75, 2 years | 10.04 | 61.45 | 58.32 | 933.78 | 1245.50 | |
| FIT47, 50-70, 2 years | 11.92 | 54.26 | 51.73 | 731.00 | 1161.46 | |
| FIT47, 50-75, 2 years | 11.46 | 56.02 | 51.87 | 756.73 | 1176.62 | |
| COL, 35-70, 3 years | 3.11 | 88.07 | 443.34 | 10170.14 | 5336.68 | |
| COL, 35-75, 3 years | 2.80 | 89.25 | 455.56 | 10591.84 | 5436.63 | |
| COL, 40-70, 3 years | 3.52 | 86.48 | 379.76 | 8555.94 | 4215.14 | |
| COL, 40-75, 3 years | 3.18 | 87.79 | 386.95 | 8849.50 | 4284.02 | |
| COL, 45-70, 3 years | 4.04 | 84.51 | 316.91 | 6975.23 | 3279.24 | |
| COL, 45-75, 3 years | 3.80 | 85.40 | 330.19 | 7346.64 | 3365.47 | |
| COL, 50-70, 3 years | 5.72 | 78.06 | 258.88 | 5263.02 | 2494.03 | |
| COL, 50-75, 3 years | 5.42 | 79.21 | 275.46 | 5682.77 | 2593.53 | |
| COL, 35-70, 5 years | 5.16 | 80.21 | 298.77 | 6241.24 | 3577.31 | |
| COL, 35-75, 5 years | 4.93 | 81.06 | 305.24 | 6446.76 | 3624.46 | |
| COL, 40-70, 5 years | 5.39 | 79.31 | 254.83 | 5264.81 | 2891.22 | |
| COL, 40-75, 5 years | 5.15 | 80.25 | 261.64 | 5468.25 | 2937.90 | |
| COL, 45-70, 5 years | 5.84 | 77.59 | 214.93 | 4343.68 | 2333.61 | |
| COL, 45-75, 5 years | 5.71 | 78.08 | 222.19 | 4519.44 | 2373.50 | |
| COL, 50-70, 5 years | 7.12 | 72.67 | 181.08 | 3427.78 | 1892.12 | |
| COL, 50-75, 5 years | 6.90 | 73.50 | 190.79 | 3653.55 | 1943.56 | |
| COL, 35-70, 10 years | 5.89 | 77.40 | 210.21 | 4237.92 | 2636.91 | |
| COL, 35-75, 10 years | 5.67 | 78.26 | 217.36 | 4429.72 | 2681.54 | |
| COL, 40-70, 10 years | 6.11 | 76.56 | 188.43 | 3757.28 | 2252.49 | |
| COL, 40-75, 10 years | 6.11 | 76.56 | 188.43 | 3757.28 | 2252.49 | |
| COL, 45-70, 10 years | 6.44 | 75.28 | 161.45 | 3166.05 | 1897.15 | |
| COL, 45-75, 10 years | 6.26 | 75.98 | 168.85 | 3341.50 | 1937.96 | |
| COL, 50-70, 10 years | 7.52 | 71.14 | 143.09 | 2651.50 | 1627.44 | |
| COL, 50-75, 10 years | 7.52 | 71.14 | 143.09 | 2651.50 | 1627.44 | |
| MTDNA, 35-70, 1 years | 4.86 | 81.34 | 422.67 | 8956.34 | 13019.09 | |
| MTDNA, 35-75, 1 years | 4.63 | 82.23 | 436.12 | 9341.64 | 13310.43 | |
| MTDNA, 40-70, 1 years | 5.14 | 80.26 | 347.83 | 7273.04 | 9521.90 | |
| MTDNA, 40-75, 1 years | 4.88 | 81.28 | 362.41 | 7672.24 | 9823.88 | |
| MTDNA, 45-70, 1 years | 5.72 | 78.05 | 282.45 | 5742.12 | 6860.79 | |
| MTDNA, 45-75, 1 years | 5.49 | 78.93 | 297.85 | 6123.73 | 7149.75 | |
| MTDNA, 50-70, 1 years | 7.03 | 73.00 | 228.97 | 4355.05 | 4896.02 | |
| MTDNA, 50-75, 1 years | 6.82 | 73.82 | 245.75 | 4725.72 | 5176.45 | |
| MTDNA, 35-70, 2 years | 5.20 | 80.05 | 264.78 | 5520.70 | 7673.64 | |
| MTDNA, 35-75, 2 years | 4.97 | 80.91 | 272.16 | 5737.22 | 7838.30 | |
| MTDNA, 40-70, 2 years | 5.49 | 78.93 | 225.23 | 4630.76 | 5845.17 | |
| MTDNA, 40-75, 2 years | 5.31 | 79.62 | 231.06 | 4792.09 | 5967.84 | |
| MTDNA, 45-70, 2 years | 6.07 | 76.70 | 186.84 | 3733.16 | 4369.94 | |
| MTDNA, 45-75, 2 years | 5.87 | 77.46 | 195.44 | 3943.97 | 4530.52 | |
| MTDNA, 50-70, 2 years | 7.45 | 71.39 | 156.55 | 2911.75 | 3298.93 | |
| MTDNA, 50-75, 2 years | 7.28 | 72.04 | 163.47 | 3068.33 | 3417.94 | |

*Including deaths from complications of surveillance; CRC = colorectal cancer; NNS= number needed to screen to prevent one death from colorectal cancer; COLs = number of colonoscopies.

†outcomes not discounted.

‡compared with no surveillance.

§ currency is euro.

**Supplementary Table S5:** Number of colonoscopies needed to prevent a colorectal cancer death for each surveillance strategies among HL Survivors (with procarbazine chemotherapy without infradiaphragmatic radiotherapy, base case analysis).

| **Surveillance strategy** | **Outcomes per 1,000 HL survivors free of CRC diagnosis and aged 35 years in 2019 (3%)*** | | | | |
| --- | --- | --- | --- | --- | --- |
| **CRC deaths predicted***,† | **CRC mortality**  **(reduction, %)***,‡ | **NNS**† | **COLs**† | **Total**  **Costs**  **($1,000**§**)** |
| No Surveillance | 17.21 | 0.00 | 0.00 | 49.03 | 637.38 |
| FIT10, 35-70, 1 years | 3.69 | 78.55 | 238.72 | 3227.48 | 2102.58 |
| FIT10, 35-75, 1 years | 3.48 | 79.76 | 242.98 | 3336.13 | 2134.91 |
| FIT10, 40-70, 1 years | 3.89 | 77.42 | 205.29 | 2734.47 | 1724.30 |
| FIT10, 40-75, 1 years | 3.67 | 78.69 | 210.07 | 2844.33 | 1757.12 |
| FIT10, 45-70, 1 years | 4.34 | 74.80 | 174.02 | 2239.65 | 1412.30 |
| FIT10, 45-75, 1 years | 4.12 | 76.06 | 179.43 | 2348.79 | 1444.88 |
| FIT10, 50-70, 1 years | 5.21 | 69.71 | 145.47 | 1745.68 | 1165.49 |
| FIT10, 50-75, 1 years | 4.98 | 71.04 | 151.65 | 1854.68 | 1198.10 |
| FIT10, 35-70, 2 years | 4.91 | 71.48 | 162.54 | 1999.26 | 1469.52 |
| FIT10, 35-75, 2 years | 4.58 | 73.38 | 163.77 | 2068.47 | 1492.37 |
| FIT10, 40-70, 2 years | 5.07 | 70.53 | 142.76 | 1733.06 | 1270.46 |
| FIT10, 40-75, 2 years | 4.84 | 71.87 | 144.02 | 1781.51 | 1286.55 |
| FIT10, 45-70, 2 years | 5.60 | 67.44 | 123.87 | 1438.17 | 1096.78 |
| FIT10, 45-75, 2 years | 5.25 | 69.47 | 126.08 | 1507.93 | 1120.04 |
| FIT10, 50-70, 2 years | 6.41 | 62.78 | 106.03 | 1145.15 | 962.47 |
| FIT10, 50-75, 2 years | 6.15 | 64.28 | 108.01 | 1194.54 | 978.93 |
| FIT20, 35-70, 1 years | 4.29 | 75.10 | 174.34 | 2252.49 | 1680.54 |
| FIT20, 35-75, 1 years | 4.02 | 76.64 | 176.07 | 2322.30 | 1704.99 |
| FIT20, 40-70, 1 years | 4.51 | 73.80 | 152.14 | 1932.19 | 1418.46 |
| FIT20, 40-75, 1 years | 4.22 | 75.45 | 154.16 | 2002.57 | 1443.12 |
| FIT20, 45-70, 1 years | 4.97 | 71.14 | 130.67 | 1599.38 | 1200.05 |
| FIT20, 45-75, 1 years | 4.68 | 72.80 | 133.27 | 1669.93 | 1224.76 |
| FIT20, 50-70, 1 years | 5.86 | 65.96 | 110.71 | 1256.57 | 1026.62 |
| FIT20, 50-75, 1 years | 5.55 | 67.73 | 113.88 | 1327.88 | 1051.66 |
| FIT20, 35-70, 2 years | 6.03 | 64.95 | 124.46 | 1391.42 | 1233.64 |
| FIT20, 35-75, 2 years | 5.62 | 67.36 | 124.15 | 1438.89 | 1253.53 |
| FIT20, 40-70, 2 years | 6.17 | 64.15 | 110.40 | 1218.77 | 1097.87 |
| FIT20, 40-75, 2 years | 5.89 | 65.80 | 110.58 | 1251.76 | 1111.84 |
| FIT20, 45-70, 2 years | 6.71 | 61.00 | 97.14 | 1020.02 | 976.66 |
| FIT20, 45-75, 2 years | 6.27 | 63.55 | 97.65 | 1068.27 | 997.07 |
| FIT20, 50-70, 2 years | 7.47 | 56.59 | 84.13 | 819.43 | 884.79 |
| FIT20, 50-75, 2 years | 7.16 | 58.40 | 84.91 | 853.36 | 899.17 |
| FIT47, 35-70, 1 years | 4.86 | 71.75 | 135.78 | 1676.92 | 1457.42 |
| FIT47, 35-75, 1 years | 4.53 | 73.68 | 136.21 | 1727.13 | 1479.07 |
| FIT47, 40-70, 1 years | 5.09 | 70.44 | 119.71 | 1450.86 | 1257.26 |
| FIT47, 40-75, 1 years | 4.73 | 72.50 | 120.30 | 1501.31 | 1279.06 |
| FIT47, 45-70, 1 years | 5.55 | 67.73 | 103.77 | 1209.94 | 1090.54 |
| FIT47, 45-75, 1 years | 5.19 | 69.83 | 104.90 | 1260.88 | 1112.37 |
| FIT47, 50-70, 1 years | 6.44 | 62.57 | 88.75 | 955.88 | 957.44 |
| FIT47, 50-75, 1 years | 6.05 | 64.83 | 90.29 | 1007.67 | 979.88 |
| FIT47, 35-70, 2 years | 6.93 | 59.76 | 99.83 | 1026.22 | 1110.71 |
| FIT47, 35-75, 2 years | 6.43 | 62.65 | 98.52 | 1062.07 | 1130.45 |
| FIT47, 40-70, 2 years | 7.01 | 59.26 | 88.75 | 905.26 | 1008.62 |
| FIT47, 40-75, 2 years | 6.68 | 61.20 | 88.33 | 930.10 | 1022.34 |
| FIT47, 45-70, 2 years | 7.57 | 56.03 | 79.02 | 761.72 | 916.32 |
| FIT47, 45-75, 2 years | 7.04 | 59.07 | 78.50 | 798.34 | 936.65 |
| FIT47, 50-70, 2 years | 8.25 | 52.05 | 68.73 | 615.81 | 847.06 |
| FIT47, 50-75, 2 years | 7.89 | 54.16 | 68.84 | 641.56 | 861.39 |
| COL, 35-70, 3 years | 2.03 | 88.21 | 669.33 | 10160.39 | 5176.05 |
| COL, 35-75, 3 years | 1.79 | 89.58 | 688.48 | 10616.32 | 5284.09 |
| COL, 40-70, 3 years | 2.30 | 86.63 | 575.04 | 8573.79 | 4058.11 |
| COL, 40-75, 3 years | 2.06 | 88.03 | 585.83 | 8875.40 | 4128.92 |
| COL, 45-70, 3 years | 2.64 | 84.65 | 478.84 | 6976.69 | 3111.26 |
| COL, 45-75, 3 years | 2.47 | 85.68 | 500.60 | 7378.89 | 3204.45 |
| COL, 50-70, 3 years | 3.74 | 78.28 | 390.91 | 5265.52 | 2305.70 |
| COL, 50-75, 3 years | 3.51 | 79.60 | 417.52 | 5719.98 | 2413.45 |
| COL, 35-70, 5 years | 3.41 | 80.16 | 452.15 | 6239.69 | 3393.95 |
| COL, 35-75, 5 years | 3.26 | 81.06 | 462.50 | 6451.91 | 3442.26 |
| COL, 40-70, 5 years | 3.61 | 79.05 | 386.61 | 5257.83 | 2703.04 |
| COL, 40-75, 5 years | 3.44 | 80.03 | 397.10 | 5468.11 | 2751.00 |
| COL, 45-70, 5 years | 3.88 | 77.43 | 324.51 | 4325.70 | 2134.75 |
| COL, 45-75, 5 years | 3.78 | 78.04 | 336.06 | 4513.31 | 2177.04 |
| COL, 50-70, 5 years | 4.73 | 72.53 | 273.10 | 3408.23 | 1676.75 |
| COL, 50-75, 5 years | 4.58 | 73.39 | 288.11 | 3638.83 | 1729.06 |
| COL, 35-70, 10 years | 4.11 | 76.12 | 309.44 | 4053.60 | 2376.52 |
| COL, 35-75, 10 years | 3.92 | 77.20 | 320.14 | 4254.68 | 2422.99 |
| COL, 40-70, 10 years | 4.27 | 75.19 | 277.66 | 3592.89 | 1997.47 |
| COL, 40-75, 10 years | 4.27 | 75.19 | 277.66 | 3592.89 | 1997.47 |
| COL, 45-70, 10 years | 4.45 | 74.17 | 234.95 | 2998.00 | 1641.37 |
| COL, 45-75, 10 years | 4.29 | 75.09 | 246.54 | 3185.25 | 1684.53 |
| COL, 50-70, 10 years | 5.15 | 70.11 | 209.29 | 2524.01 | 1374.20 |
| COL, 50-75, 10 years | 5.15 | 70.11 | 209.29 | 2524.01 | 1374.20 |
| MTDNA, 35-70, 1 years | 3.16 | 81.64 | 660.51 | 9280.19 | 13621.20 |
| MTDNA, 35-75, 1 years | 2.98 | 82.70 | 681.36 | 9695.79 | 13935.65 |
| MTDNA, 40-70, 1 years | 3.39 | 80.30 | 546.60 | 7554.06 | 9995.81 |
| MTDNA, 40-75, 1 years | 3.19 | 81.45 | 569.36 | 7982.39 | 10320.15 |
| MTDNA, 45-70, 1 years | 3.78 | 78.01 | 443.79 | 5960.15 | 7163.51 |
| MTDNA, 45-75, 1 years | 3.61 | 79.02 | 468.58 | 6372.71 | 7476.12 |
| MTDNA, 50-70, 1 years | 4.63 | 73.10 | 358.37 | 4508.34 | 5022.85 |
| MTDNA, 50-75, 1 years | 4.47 | 74.05 | 385.38 | 4909.72 | 5326.75 |
| MTDNA, 35-70, 2 years | 3.45 | 79.94 | 399.74 | 5500.42 | 7763.53 |
| MTDNA, 35-75, 2 years | 3.28 | 80.97 | 411.64 | 5734.10 | 7941.19 |
| MTDNA, 40-70, 2 years | 3.65 | 78.81 | 339.92 | 4609.31 | 5890.70 |
| MTDNA, 40-75, 2 years | 3.51 | 79.63 | 349.06 | 4782.15 | 6022.08 |
| MTDNA, 45-70, 2 years | 4.08 | 76.31 | 281.75 | 3699.35 | 4342.56 |
| MTDNA, 45-75, 2 years | 3.91 | 77.28 | 295.39 | 3928.63 | 4516.88 |
| MTDNA, 50-70, 2 years | 4.96 | 71.17 | 235.17 | 2880.85 | 3199.10 |
| MTDNA, 50-75, 2 years | 4.83 | 71.97 | 246.27 | 3048.77 | 3326.64 |

*Including deaths from complications of surveillance; CRC = colorectal cancer; NNS= number needed to screen to prevent one death from colorectal cancer; COLs = number of colonoscopies.

†outcomes not discounted.

‡compared with no surveillance.

§ currency is euro.

**Supplementary Table S6:** Number of colonoscopies needed to prevent a colorectal cancer death for each surveillance strategies among HL Survivors (with a combination of infradiaphragmatic radiotherapy and procarbazine chemotherapy, base case analysis).

| **Surveillance strategy** | **Outcomes per 1,000 HL survivors free of CRC diagnosis and aged 35 years in 2019 (3%)*** | | | | |
| --- | --- | --- | --- | --- | --- |
| **CRC deaths predicted***,† | **CRC mortality**  **(reduction, %)***,‡ | **NNS**† | **COLs**† | **Total**  **Costs**  **($1,000**§**)** | |
| No Surveillance | 47.01 | 0.00 | 0.00 | 126.75 | 1753.40 | |
| FIT10, 35-70, 1 years | 9.30 | 80.22 | 98.49 | 3714.14 | 2876.79 | |
| FIT10, 35-75, 1 years | 9.00 | 80.85 | 100.07 | 3803.63 | 2904.23 | |
| FIT10, 40-70, 1 years | 9.74 | 79.29 | 85.69 | 3193.48 | 2504.44 | |
| FIT10, 40-75, 1 years | 9.43 | 79.95 | 87.39 | 3284.20 | 2532.26 | |
| FIT10, 45-70, 1 years | 11.00 | 76.61 | 73.58 | 2649.68 | 2216.43 | |
| FIT10, 45-75, 1 years | 10.68 | 77.27 | 75.40 | 2739.39 | 2243.88 | |
| FIT10, 50-70, 1 years | 13.85 | 70.55 | 62.94 | 2087.02 | 2023.32 | |
| FIT10, 50-75, 1 years | 13.52 | 71.24 | 64.99 | 2176.53 | 2050.63 | |
| FIT10, 35-70, 2 years | 11.43 | 75.68 | 72.38 | 2575.32 | 2357.39 | |
| FIT10, 35-75, 2 years | 10.98 | 76.64 | 73.10 | 2633.87 | 2377.91 | |
| FIT10, 40-70, 2 years | 11.93 | 74.62 | 64.68 | 2268.90 | 2157.65 | |
| FIT10, 40-75, 2 years | 11.63 | 75.27 | 65.30 | 2310.27 | 2172.08 | |
| FIT10, 45-70, 2 years | 13.33 | 71.65 | 56.86 | 1915.21 | 1997.79 | |
| FIT10, 45-75, 2 years | 12.85 | 72.66 | 57.79 | 1974.18 | 2018.61 | |
| FIT10, 50-70, 2 years | 16.09 | 65.77 | 49.70 | 1536.86 | 1898.59 | |
| FIT10, 50-75, 2 years | 15.74 | 66.52 | 50.50 | 1579.27 | 1913.49 | |
| FIT20, 35-70, 1 years | 10.27 | 78.15 | 76.82 | 2822.42 | 2527.69 | |
| FIT20, 35-75, 1 years | 9.91 | 78.92 | 77.65 | 2880.98 | 2548.95 | |
| FIT20, 40-70, 1 years | 10.80 | 77.04 | 68.07 | 2464.70 | 2268.32 | |
| FIT20, 40-75, 1 years | 10.42 | 77.84 | 68.97 | 2523.77 | 2290.01 | |
| FIT20, 45-70, 1 years | 12.10 | 74.27 | 59.31 | 2070.56 | 2067.78 | |
| FIT20, 45-75, 1 years | 11.70 | 75.11 | 60.32 | 2129.88 | 2089.37 | |
| FIT20, 50-70, 1 years | 15.00 | 68.10 | 51.45 | 1646.81 | 1938.69 | |
| FIT20, 50-75, 1 years | 14.57 | 69.01 | 52.61 | 1706.70 | 1960.50 | |
| FIT20, 35-70, 2 years | 13.70 | 70.86 | 58.29 | 1941.60 | 2172.61 | |
| FIT20, 35-75, 2 years | 13.10 | 72.14 | 58.50 | 1983.70 | 2191.98 | |
| FIT20, 40-70, 2 years | 14.16 | 69.87 | 52.74 | 1732.54 | 2037.73 | |
| FIT20, 40-75, 2 years | 13.77 | 70.71 | 53.01 | 1761.96 | 2051.10 | |
| FIT20, 45-70, 2 years | 15.59 | 66.83 | 47.04 | 1478.15 | 1928.56 | |
| FIT20, 45-75, 2 years | 14.95 | 68.20 | 47.44 | 1521.00 | 1948.41 | |
| FIT20, 50-70, 2 years | 18.23 | 61.23 | 41.69 | 1199.78 | 1866.76 | |
| FIT20, 50-75, 2 years | 17.77 | 62.21 | 42.08 | 1230.34 | 1880.77 | |
| FIT47, 35-70, 1 years | 11.34 | 75.88 | 62.97 | 2246.09 | 2353.82 | |
| FIT47, 35-75, 1 years | 10.87 | 76.89 | 63.35 | 2289.32 | 2373.45 | |
| FIT47, 40-70, 1 years | 11.89 | 74.71 | 56.40 | 1980.70 | 2156.44 | |
| FIT47, 40-75, 1 years | 11.41 | 75.73 | 56.86 | 2024.32 | 2176.58 | |
| FIT47, 45-70, 1 years | 13.21 | 71.91 | 49.66 | 1678.36 | 2005.97 | |
| FIT47, 45-75, 1 years | 12.70 | 72.99 | 50.20 | 1722.50 | 2026.06 | |
| FIT47, 50-70, 1 years | 16.07 | 65.81 | 43.44 | 1344.12 | 1912.37 | |
| FIT47, 50-75, 1 years | 15.52 | 66.98 | 44.11 | 1389.12 | 1932.93 | |
| FIT47, 35-70, 2 years | 15.65 | 66.72 | 48.47 | 1520.15 | 2091.86 | |
| FIT47, 35-75, 2 years | 14.89 | 68.34 | 48.37 | 1553.70 | 2112.83 | |
| FIT47, 40-70, 2 years | 16.07 | 65.82 | 44.20 | 1367.45 | 1993.44 | |
| FIT47, 40-75, 2 years | 15.56 | 66.89 | 44.23 | 1390.88 | 2007.82 | |
| FIT47, 45-70, 2 years | 17.52 | 62.74 | 39.81 | 1174.12 | 1912.17 | |
| FIT47, 45-75, 2 years | 16.71 | 64.46 | 39.89 | 1208.59 | 1933.79 | |
| FIT47, 50-70, 2 years | 19.98 | 57.51 | 35.54 | 960.59 | 1870.91 | |
| FIT47, 50-75, 2 years | 19.40 | 58.73 | 35.68 | 985.08 | 1885.93 | |
| COL, 35-70, 3 years | 5.72 | 87.84 | 246.02 | 10158.26 | 5700.33 | |
| COL, 35-75, 3 years | 5.30 | 88.73 | 252.36 | 10525.97 | 5787.27 | |
| COL, 40-70, 3 years | 6.50 | 86.18 | 209.97 | 8505.99 | 4575.85 | |
| COL, 40-75, 3 years | 5.99 | 87.26 | 214.02 | 8779.29 | 4639.33 | |
| COL, 45-70, 3 years | 7.54 | 83.96 | 175.76 | 6937.07 | 3667.19 | |
| COL, 45-75, 3 years | 7.22 | 84.64 | 182.46 | 7260.08 | 3742.30 | |
| COL, 50-70, 3 years | 10.91 | 76.79 | 144.54 | 5217.87 | 2945.63 | |
| COL, 50-75, 3 years | 10.50 | 77.66 | 152.89 | 5582.19 | 3031.64 | |
| COL, 35-70, 5 years | 8.92 | 81.03 | 165.85 | 6317.23 | 4020.98 | |
| COL, 35-75, 5 years | 8.61 | 81.69 | 169.59 | 6512.38 | 4065.93 | |
| COL, 40-70, 5 years | 9.40 | 80.00 | 142.28 | 5351.15 | 3348.62 | |
| COL, 40-75, 5 years | 9.03 | 80.79 | 145.97 | 5544.06 | 3393.22 | |
| COL, 45-70, 5 years | 10.28 | 78.13 | 120.76 | 4435.60 | 2810.78 | |
| COL, 45-75, 5 years | 10.11 | 78.50 | 124.41 | 4590.69 | 2846.05 | |
| COL, 50-70, 5 years | 12.96 | 72.43 | 102.63 | 3494.46 | 2411.72 | |
| COL, 50-75, 5 years | 12.64 | 73.11 | 107.94 | 3709.73 | 2460.93 | |
| COL, 35-70, 10 years | 9.74 | 79.28 | 123.73 | 4611.37 | 3211.13 | |
| COL, 35-75, 10 years | 9.46 | 79.88 | 127.54 | 4789.01 | 3252.55 | |
| COL, 40-70, 10 years | 10.18 | 78.35 | 111.21 | 4095.98 | 2816.99 | |
| COL, 40-75, 10 years | 10.18 | 78.35 | 111.21 | 4095.98 | 2816.99 | |
| COL, 45-70, 10 years | 10.86 | 76.91 | 96.42 | 3485.51 | 2460.25 | |
| COL, 45-75, 10 years | 10.64 | 77.38 | 100.09 | 3640.37 | 2496.30 | |
| COL, 50-70, 10 years | 13.33 | 71.64 | 85.40 | 2876.41 | 2202.15 | |
| COL, 50-75, 10 years | 13.33 | 71.64 | 85.40 | 2876.41 | 2202.15 | |
| MTDNA, 35-70, 1 years | 8.64 | 81.63 | 222.08 | 8521.07 | 12174.57 | |
| MTDNA, 35-75, 1 years | 8.32 | 82.30 | 228.98 | 8859.25 | 12430.01 | |
| MTDNA, 40-70, 1 years | 9.09 | 80.67 | 182.62 | 6925.00 | 8947.83 | |
| MTDNA, 40-75, 1 years | 8.72 | 81.45 | 190.11 | 7279.31 | 9215.48 | |
| MTDNA, 45-70, 1 years | 10.19 | 78.32 | 149.09 | 5489.42 | 6591.35 | |
| MTDNA, 45-75, 1 years | 9.89 | 78.97 | 156.85 | 5822.28 | 6843.02 | |
| MTDNA, 50-70, 1 years | 12.90 | 72.57 | 122.50 | 4178.37 | 4919.01 | |
| MTDNA, 50-75, 1 years | 12.61 | 73.19 | 130.86 | 4501.74 | 5163.31 | |
| MTDNA, 35-70, 2 years | 9.01 | 80.84 | 148.06 | 5626.11 | 7658.98 | |
| MTDNA, 35-75, 2 years | 8.72 | 81.45 | 151.93 | 5817.30 | 7804.52 | |
| MTDNA, 40-70, 2 years | 9.48 | 79.84 | 126.25 | 4738.25 | 5928.58 | |
| MTDNA, 40-75, 2 years | 9.25 | 80.32 | 129.28 | 4881.55 | 6037.72 | |
| MTDNA, 45-70, 2 years | 10.63 | 77.38 | 105.67 | 3844.33 | 4586.87 | |
| MTDNA, 45-75, 2 years | 10.38 | 77.92 | 109.96 | 4027.80 | 4726.51 | |
| MTDNA, 50-70, 2 years | 13.45 | 71.39 | 89.29 | 2996.47 | 3648.98 | |
| MTDNA, 50-75, 2 years | 13.24 | 71.84 | 92.83 | 3134.82 | 3754.14 | |

*Including deaths from complications of surveillance; CRC = colorectal cancer; NNS= number needed to screen to prevent one death from colorectal cancer; COLs = number of colonoscopies.

†outcomes not discounted.

‡compared with no surveillance.

§ currency is euro.
